# Supplementary material
Source: ML conference proceedings conference paper supplement (https://proceedings.neurips.cc/paper_files/paper/2020/hash/099fe6b0b444c23836c4a5d07346082b-Abstract.html)
Supplement: Supplementary file [file 099fe6b0b444c23836c4a5d07346082b-Supplemental.pdf]

## A Table of Notations

Table 3: Table of Notations.

| Notation                                                                              | Description                                                                                                     |
|---------------------------------------------------------------------------------------|-----------------------------------------------------------------------------------------------------------------|
| $\mathbf{X}$                                                                          | A batch of inputs (each row is a sample)                                                                        |
| $\mathbf{Y}$                                                                          | A batch of labels (each row is a sample)                                                                        |
| $\mathcal{B}$                                                                         | A batch $\mathcal{B} = (\mathbf{X}, \mathbf{Y})$                                                                |
| $N, C, L$                                                                             | Batch size, number of classes, and number of layers                                                             |
| $Q_f(\cdot), Q_\theta(\cdot), Q_b(\cdot)$                                             | activation / parameter / gradient quantizer                                                                     |
| $\mathbf{F}(\cdot; \Theta)$                                                           | DNN with parameter $\Theta$                                                                                     |
| $\mathbf{F}^{(l)}(\cdot; \Theta^{(l)})$                                               | $l$ -th layer with parameter $\Theta^{(l)}$                                                                     |
| $\mathbf{H}^{(l)}$                                                                    | Activation matrix at layer $l$ , whose size is $N \times D^{(l)}$                                               |
| $\tilde{\mathbf{H}}^{(l)}, \tilde{\Theta}^{(l)}$                                      | Quantized activation / parameter                                                                                |
| $\ell(\mathbf{H}^{(L)}, \mathcal{Y})$                                                 | loss function of prediction $\mathbf{H}^{(L)}$ and label $\mathcal{Y}$ .                                        |
| $\nabla_{\Theta} \ell$                                                                | Gradient of $\ell$ w.r.t. $\Theta$                                                                              |
| $\mathbf{J}^{(l)}$                                                                    | Jacobian matrix $\frac{\partial \text{vec}(\mathbf{H}^{(l)})}{\partial \text{vec}(\tilde{\mathbf{H}}^{(l-1)})}$ |
| $\mathbf{K}^{(l)}$                                                                    | Jacobian matrix $\frac{\partial \text{vec}(\mathbf{H}^{(l)})}{\partial \text{vec}(\tilde{\Theta}^{(l)})}$       |
| $\nabla_{\mathbf{H}^{(l)}}, \nabla_{\Theta^{(l)}}, \nabla_{\Theta}$                   | QAT gradient for activation / parameter                                                                         |
| $\hat{\nabla}_{\mathbf{H}^{(l)}}, \hat{\nabla}_{\Theta^{(l)}}, \hat{\nabla}_{\Theta}$ | FQT gradient for activation / parameter                                                                         |
| $\nabla_{\mathbf{h}_i^{(l)}}, \hat{\nabla}_{\mathbf{h}_i^{(l)}}$                      | $i$ -th row of QAT / FQT activation gradient at $l$ -th layer                                                   |
| $\mathbb{E}[X   Y]$                                                                   | Conditional expectation of $X$ given $Y$                                                                        |
| $\text{Var}[X   Y]$                                                                   | Conditional variance of $X$ given $Y$                                                                           |
| $R(\mathbf{X})$                                                                       | Dynamic range of $\mathbf{X}$ , i.e., $\max \mathbf{X} - \min \mathbf{X}$                                       |
| $b, B$                                                                                | Number of quantization bits / bins                                                                              |

## B Preliminary Knowledge

**Proposition 1.** (Law of total variance) *If  $\mathbf{X}$  and  $\mathbf{Y}$  are random matrices on the same probability space, and all elements of  $\text{Var}[\mathbf{Y}]$  is finite, then*

$$\text{Var}[\mathbf{Y}] = \mathbb{E}[\text{Var}[\mathbf{Y} | \mathbf{X}]] + \text{Var}[\mathbb{E}[\mathbf{Y} | \mathbf{X}]].$$

*Proof.* By the definition of variance,

$$\text{Var}[\mathbf{Y}] = \sum_{ij} \mathbb{E}[Y_{ij}^2] - \mathbb{E}[Y_{ij}]^2.$$

By law of total expectation,

$$\begin{aligned} \mathbb{E}[Y_{ij}^2] - \mathbb{E}[Y_{ij}]^2 &= \mathbb{E}[\mathbb{E}[Y_{ij}^2 | \mathbf{X}]] - \mathbb{E}[\mathbb{E}[Y_{ij} | \mathbf{X}]]^2 \\ &= \mathbb{E}[\text{Var}[Y_{ij} | \mathbf{X}] + \mathbb{E}[Y_{ij} | \mathbf{X}]^2] - \mathbb{E}[\mathbb{E}[Y_{ij} | \mathbf{X}]]^2 \\ &= \mathbb{E}[\text{Var}[Y_{ij} | \mathbf{X}]] + \mathbb{E}[\mathbb{E}[Y_{ij} | \mathbf{X}]^2] - \mathbb{E}[\mathbb{E}[Y_{ij} | \mathbf{X}]]^2 \\ &= \mathbb{E}[\text{Var}[Y_{ij} | \mathbf{X}]] + \text{Var}[\mathbb{E}[Y_{ij} | \mathbf{X}]]. \end{aligned}$$

Putting it together, we have

$$\text{Var}[\mathbf{Y}] = \sum_{ij} \mathbb{E}[\text{Var}[Y_{ij} | \mathbf{X}]] + \text{Var}[\mathbb{E}[Y_{ij} | \mathbf{X}]] = \mathbb{E}[\text{Var}[\mathbf{Y} | \mathbf{X}]] + \text{Var}[\mathbb{E}[\mathbf{Y} | \mathbf{X}]].$$

□

**Proposition 2.** *For a random matrix  $\mathbf{X}$  and a constant matrix  $\mathbf{W}$ ,*

$$\text{Var}[\mathbf{X}\mathbf{W}] \leq \text{Var}[\mathbf{X}] \|\mathbf{W}\|_2^2.$$

*Proof.* Firstly, for any matrices  $\mathbf{A}$  and  $\mathbf{B}$ , by the definition of Frobenius and operator norm, we have

$$\|\mathbf{AB}\|_F^2 = \sum_i \|\mathbf{a}_i \mathbf{B}\|_2^2 \leq \sum_i \|\mathbf{a}_i\|_2^2 \|\mathbf{B}\|_2^2 = \|\mathbf{A}\|_F^2 \|\mathbf{B}\|_2^2.$$

Let  $\boldsymbol{\mu} = \mathbb{E}[\mathbf{X}]$ , and utilize this inequality, we have

$$\begin{aligned} \text{Var}[\mathbf{XW}] &= \mathbb{E} \|\text{vec}(\mathbf{XW}) - \mathbb{E}[\text{vec}(\mathbf{XW})]\|_2^2 = \mathbb{E} \|\mathbf{XW} - \mathbb{E}[\mathbf{XW}]\|_F^2 \\ &= \mathbb{E} \|(\mathbf{X} - \boldsymbol{\mu})\mathbf{W}\|_F^2 \leq \mathbb{E} \left[ \|\mathbf{X} - \boldsymbol{\mu}\|_F^2 \|\mathbf{W}\|_2^2 \right] = \text{Var}[\mathbf{X}] \|\mathbf{W}\|_2^2. \end{aligned}$$

□

**Proposition 3.** For constant matrices  $\mathbf{A}$ ,  $\mathbf{B}$  and a random matrix  $\boldsymbol{\epsilon}$ , if for all entries  $i, j$ ,  $\text{Var}[\epsilon_{ij}] \leq \sigma^2$ , then

$$\text{Var}[\mathbf{A}\boldsymbol{\epsilon}\mathbf{B}] \leq \sigma^2 \|\mathbf{A}\|_F^2 \|\mathbf{B}\|_F^2.$$

*Proof.*

$$\begin{aligned} \text{Var}[\mathbf{A}\boldsymbol{\epsilon}\mathbf{B}] &= \sum_{ij} \text{Var}[\mathbf{a}_i \boldsymbol{\epsilon}_{:,j} \mathbf{B}] = \sum_{ij} \text{Var} \left[ \sum_{kl} A_{ik} \epsilon_{kl} B_{lj} \right] = \sum_{ijkl} A_{ik}^2 \text{Var}[\epsilon_{kl}] B_{lj}^2 \\ &\leq \sigma^2 \sum_{ijkl} A_{ik}^2 B_{lj}^2 = \sigma^2 \|\mathbf{A}\|_F^2 \|\mathbf{B}\|_F^2. \end{aligned}$$

□

## C Proofs

In this section, we give the proofs on the gradient bias and variance used in the main text.

### C.1 Proof of Theorem 1

*Proof.* We prove by induction. Firstly,

$$\hat{\nabla}_{\mathbf{H}^{(L)}} = \nabla_{\mathbf{H}^{(L)}} = \partial \ell / \partial \mathbf{H}^{(L)},$$

so  $\mathbb{E}[\hat{\nabla}_{\mathbf{H}^{(l)}} \mid \mathcal{B}] = \nabla_{\mathbf{H}^{(l)}}$  holds for  $l = L$ . Assume that  $\mathbb{E}[\hat{\nabla}_{\mathbf{H}^{(l)}} \mid \mathcal{B}] = \nabla_{\mathbf{H}^{(l)}}$  holds for  $l$ , then we have

$$\text{vec} \left( \mathbb{E}[\hat{\nabla}_{\mathbf{H}^{(l-1)}} \mid \mathcal{B}] \right) = \mathbb{E} \left[ \text{vec}(\hat{\nabla}_{\mathbf{H}^{(l-1)}}) \mid \mathcal{B} \right],$$

because  $\text{vec}(\cdot)$  does not affect the expectation. According to the definition Eq. (5), we have

$$\mathbb{E} \left[ \text{vec}(\hat{\nabla}_{\mathbf{H}^{(l-1)}}) \mid \mathcal{B} \right] = \mathbb{E} \left[ \text{vec}(Q_b(\hat{\nabla}_{\mathbf{H}^{(l)}})) \mathbf{J}^{(l)} \mid \mathcal{B} \right].$$

Since  $\mathbf{J}^{(l)}$  is deterministic given  $\mathcal{B}$ , we have

$$\mathbb{E} \left[ \text{vec}(Q_b(\hat{\nabla}_{\mathbf{H}^{(l)}})) \mathbf{J}^{(l)} \mid \mathcal{B} \right] = \text{vec} \left( \mathbb{E} \left[ Q_b(\hat{\nabla}_{\mathbf{H}^{(l)}}) \mid \mathcal{B} \right] \right) \mathbf{J}^{(l)} = \text{vec} \left( \mathbb{E}[\hat{\nabla}_{\mathbf{H}^{(l)}} \mid \mathcal{B}] \right) \mathbf{J}^{(l)}.$$

By induction assumption and Eq. (4),

$$\text{vec} \left( \mathbb{E}[\hat{\nabla}_{\mathbf{H}^{(l)}} \mid \mathcal{B}] \right) \mathbf{J}^{(l)} = \text{vec}(\nabla_{\mathbf{H}^{(l)}}) \mathbf{J}^{(l)} = \text{vec}(\nabla_{\mathbf{H}^{(l-1)}}).$$

So  $\mathbb{E}[\hat{\nabla}_{\mathbf{H}^{(l-1)}} \mid \mathcal{B}] = \nabla_{\mathbf{H}^{(l-1)}}$ . Similarly,

$$\text{vec} \left( \mathbb{E}[\hat{\nabla}_{\boldsymbol{\Theta}^{(l)}} \mid \mathcal{B}] \right) = \mathbb{E} \left[ \text{vec}(Q_b(\hat{\nabla}_{\mathbf{H}^{(l)}})) \mathbf{K}^{(l)} \mid \mathcal{B} \right] = \text{vec}(\nabla_{\mathbf{H}^{(l)}}) \mathbf{K}^{(l)} = \text{vec}(\nabla_{\boldsymbol{\Theta}^{(l)}}).$$

Therefore,  $\mathbb{E}[\hat{\nabla}_{\boldsymbol{\Theta}^{(l)}} \mid \mathcal{B}] = \nabla_{\boldsymbol{\Theta}^{(l)}}$ . Taking  $l$  from  $L$  to 1, we prove

$$\forall l \in [L], \mathbb{E}[\hat{\nabla}_{\mathbf{H}^{(l)}} \mid \mathcal{B}] = \nabla_{\mathbf{H}^{(l)}}; \quad \forall l \in [L]_+, \mathbb{E}[\hat{\nabla}_{\boldsymbol{\Theta}^{(l)}} \mid \mathcal{B}] = \nabla_{\boldsymbol{\Theta}^{(l)}},$$

so  $\mathbb{E}[\hat{\nabla}_{\boldsymbol{\Theta}} \mid \mathcal{B}] = \nabla_{\boldsymbol{\Theta}}$ . □

## C.2 Proof of Theorem 2

*Proof.* By Proposition 1 and Theorem 1, we have

$$\text{Var} [\hat{\nabla}_{\Theta}] = \mathbb{E} [\text{Var} [\hat{\nabla}_{\Theta} \mid \mathcal{B}]] + \text{Var} [\mathbb{E} [\hat{\nabla}_{\Theta} \mid \mathcal{B}]] = \mathbb{E} [\text{Var} [\hat{\nabla}_{\Theta} \mid \mathcal{B}]] + \text{Var} [\nabla_{\Theta}].$$

By definition of  $\text{Var} [\cdot]$ , we have  $\text{Var} [\hat{\nabla}_{\Theta} \mid \mathcal{B}] = \sum_{l=1}^L \text{Var} [\text{vec}(\hat{\nabla}_{\Theta^{(l)}}) \mid \mathcal{B}]$ . Apply Proposition 1 and Eq. (5), we have

$$\begin{aligned} & \mathbb{E} [\text{Var} [\text{vec}(\hat{\nabla}_{\Theta^{(l)}}) \mid \mathcal{B}]] \\ &= \mathbb{E} [\text{Var} [\text{vec}(Q_b(\hat{\nabla}_{\mathbf{H}^{(l)}}))\mathbf{K}^{(l)} \mid \mathcal{B}]] \\ &= \mathbb{E} [\text{Var} [\text{vec}(Q_b(\hat{\nabla}_{\mathbf{H}^{(l)}}))\mathbf{K}^{(l)} \mid \hat{\nabla}_{\mathbf{H}^{(l)}}]] + \mathbb{E} [\text{Var} [\mathbb{E} [\text{vec}(Q_b(\hat{\nabla}_{\mathbf{H}^{(l)}}))\mathbf{K}^{(l)} \mid \hat{\nabla}_{\mathbf{H}^{(l)}}] \mid \mathcal{B}]] \\ &= \mathbb{E} [\text{Var} [\text{vec}(Q_b(\hat{\nabla}_{\mathbf{H}^{(l)}}))\mathbf{K}^{(l)} \mid \hat{\nabla}_{\mathbf{H}^{(l)}}]] + \mathbb{E} [\text{Var} [\text{vec}(\hat{\nabla}_{\mathbf{H}^{(l)}})\mathbf{K}^{(l)} \mid \mathcal{B}]], \end{aligned}$$

where

$$\begin{aligned} & \mathbb{E} [\text{Var} [\text{vec}(\hat{\nabla}_{\mathbf{H}^{(l)}})\mathbf{K}^{(l)} \mid \mathcal{B}]] \\ &= \mathbb{E} [\text{Var} [\text{vec}(Q_b(\hat{\nabla}_{\mathbf{H}^{(l+1)}}))\mathbf{J}^{(l+1)}\mathbf{K}^{(l)} \mid \hat{\nabla}_{\mathbf{H}^{(l+1)}}]] + \mathbb{E} [\text{Var} [\mathbb{E} [\text{vec}(Q_b(\hat{\nabla}_{\mathbf{H}^{(l+1)}}))\mathbf{J}^{(l+1)}\mathbf{K}^{(l)} \mid \hat{\nabla}_{\mathbf{H}^{(l+1)}}] \mid \mathcal{B}]] \\ &= \mathbb{E} [\text{Var} [\text{vec}(Q_b(\hat{\nabla}_{\mathbf{H}^{(l+1)}}))\mathbf{J}^{(l+1)}\mathbf{K}^{(l)} \mid \hat{\nabla}_{\mathbf{H}^{(l+1)}}]] + \mathbb{E} [\text{Var} [\text{vec}(\hat{\nabla}_{\mathbf{H}^{(l+1)}})\mathbf{J}^{(l+1)}\mathbf{K}^{(l)} \mid \mathcal{B}]]. \end{aligned}$$

Repeat this procedure, we can finally get

$$\mathbb{E} [\text{Var} [\text{vec}(\hat{\nabla}_{\Theta^{(l)}}) \mid \mathcal{B}]] = \sum_{k=l}^L \mathbb{E} [\text{Var} [\text{vec}(Q_b(\hat{\nabla}_{\mathbf{H}^{(k)}}))\gamma^{(l,k)} \mid \hat{\nabla}_{\mathbf{H}^{(k)}}]].$$

Putting it together, we have

$$\begin{aligned} \text{Var} [\hat{\nabla}_{\Theta}] &= \mathbb{E} [\text{Var} [\hat{\nabla}_{\Theta} \mid \mathcal{B}]] + \text{Var} [\nabla_{\Theta}] = \text{Var} [\nabla_{\Theta}] + \sum_{l=1}^L \mathbb{E} [\text{Var} [\text{vec}(\hat{\nabla}_{\Theta^{(l)}}) \mid \mathcal{B}]] \\ &= \text{Var} [\nabla_{\Theta}] + \sum_{l=1}^L \sum_{k=l}^L \mathbb{E} [\text{Var} [\text{vec}(Q_b(\hat{\nabla}_{\mathbf{H}^{(k)}}))\gamma^{(l,k)} \mid \hat{\nabla}_{\mathbf{H}^{(k)}}]] \\ &= \text{Var} [\nabla_{\Theta}] + \sum_{k=1}^L \sum_{l=1}^k \mathbb{E} [\text{Var} [\text{vec}(Q_b(\hat{\nabla}_{\mathbf{H}^{(k)}}))\gamma^{(l,k)} \mid \hat{\nabla}_{\mathbf{H}^{(k)}}]] \\ &= \text{Var} [\nabla_{\Theta}] + \sum_{l=1}^L \mathbb{E} \left[ \sum_{k=1}^l \text{Var} [\text{vec}(Q_b(\hat{\nabla}_{\mathbf{H}^{(l)}}))\gamma^{(k,l)} \mid \hat{\nabla}_{\mathbf{H}^{(l)}}] \right], \quad (7) \end{aligned}$$

where in the second last line we swap the order of inner and outer summations, and in the last line we swap the symbols  $k$  and  $l$ , and utilize the linearity of expectation.

Utilizing Proposition 2, we have

$$\text{Var} [\text{vec}(Q_b(\hat{\nabla}_{\mathbf{H}^{(l)}}))\gamma^{(k,l)} \mid \hat{\nabla}_{\mathbf{H}^{(l)}}] \leq \text{Var} [\text{vec}(Q_b(\hat{\nabla}_{\mathbf{H}^{(l)}})) \mid \hat{\nabla}_{\mathbf{H}^{(l)}}] \|\gamma^{(k,l)}\|_2^2.$$

Putting it together

$$\begin{aligned} \text{Var} [\hat{\nabla}_{\Theta}] &\leq \text{Var} [\nabla_{\Theta}] + \sum_{l=1}^L \mathbb{E} \left[ \sum_{k=1}^l \text{Var} [\text{vec}(Q_b(\hat{\nabla}_{\mathbf{H}^{(l)}})) \mid \hat{\nabla}_{\mathbf{H}^{(l)}}] \|\gamma^{(k,l)}\|_2^2 \right] \\ &= \text{Var} [\nabla_{\Theta}] + \sum_{l=1}^L \mathbb{E} \left[ \text{Var} [Q_b(\hat{\nabla}_{\mathbf{H}^{(l)}}) \mid \hat{\nabla}_{\mathbf{H}^{(l)}}] \sum_{k=1}^l \|\gamma^{(k,l)}\|_2^2 \right]. \end{aligned}$$

□

## D Variance of Specific Quantizers

**Proposition 4.** (*Variance of stochastic rounding*) For any  $\mathbf{X} \in \mathbb{R}^{N \times M}$ ,  $\text{Var} [\text{SR}(\mathbf{X})] \leq \frac{NM}{4}$ .

*Proof.* For any real number  $X$ , let  $p := X - \lfloor X \rfloor \in [0, 1)$ , then

$$\begin{aligned} \text{Var} [\text{SR}(X)] &= \mathbb{E}[\text{SR}(X) - X]^2 = p(\lceil X \rceil - X)^2 + (1-p)(\lfloor X \rfloor - X)^2 \\ &= p(1-p)^2 + p^2(1-p) = p(1-p)(1-p+p) = p(1-p) \leq \frac{1}{4}. \end{aligned}$$

Therefore, according to Definition 1,

$$\text{Var} [\text{SR}(\mathbf{X})] = \sum_{ij} \text{Var} [\text{SR}(X_{ij})] = \frac{NM}{4}.$$

□

For simplicity, all the expectation and variance are conditioned on  $\hat{\mathbf{V}}_{\mathbf{H}^{(l)}}$  in the rest of this section.

### D.1 Per-tensor Quantizer

$$\begin{aligned} \text{Var} [Q_b(\hat{\mathbf{V}}_{\mathbf{H}^{(l)}})] &= \text{Var} \left[ \text{SR} \left( S^{(l)}(\hat{\mathbf{V}}_{\mathbf{H}^{(l)}} - Z^{(l)}) \right) / S^{(l)} + Z^{(l)} \right] \\ &= \frac{1}{(S^{(l)})^2} \text{Var} \left[ \text{SR} \left( S^{(l)}(\hat{\mathbf{V}}_{\mathbf{H}^{(l)}} - Z^{(l)}) \right) \right] \leq \frac{ND^{(l)}}{4(S^{(l)})^2} = \frac{ND^{(l)}}{4B^2} R(\hat{\mathbf{V}}_{\mathbf{H}^{(l)}})^2. \end{aligned}$$

### D.2 Matrix Quantizer

For the matrix quantizer defined in Eq. (11), we have

$$\text{Var} [Q_b(\hat{\mathbf{V}}_{\mathbf{H}^{(l)}})] = \text{Var} \left[ (\mathbf{S}^{(l)})^{-1} \text{SR} \left( \mathbf{S}^{(l)}(\hat{\mathbf{V}}_{\mathbf{H}^{(l)}} - \mathbf{1z}^{(l)}) \right) + \mathbf{1z}^{(l)} \right] = \text{Var} \left[ (\mathbf{S}^{(l)})^{-1} \text{SR} \left( \mathbf{S}^{(l)}(\hat{\mathbf{V}}_{\mathbf{H}^{(l)}} - \mathbf{1z}^{(l)}) \right) \right].$$

Utilizing Proposition 3 with  $\mathbf{A} = (\mathbf{S}^{(l)})^{-1}$ ,  $\boldsymbol{\epsilon} = \text{SR} \left( \mathbf{S}^{(l)}(\hat{\mathbf{V}}_{\mathbf{H}^{(l)}} - \mathbf{1z}^{(l)}) \right)$ , and  $\mathbf{B} = \mathbf{I}$ ,

$$\text{Var} [Q_b(\hat{\mathbf{V}}_{\mathbf{H}^{(l)}})] \leq \frac{1}{4} \left\| (\mathbf{S}^{(l)})^{-1} \right\|_F^2 \|\mathbf{I}\|_F^2 = \frac{D^{(l)}}{4} \left\| (\mathbf{S}^{(l)})^{-1} \right\|_F^2. \quad (13)$$

Minimizing Eq. (13) w.r.t.  $\mathbf{S}^{(l)}$  yields optimization problem (12) as follows

$$\min_{\mathbf{S}^{(l)}} \left\| (\mathbf{S}^{(l)})^{-1} \right\|_F^2, \text{ s.t. } R(\mathbf{S}^{(l)} \hat{\mathbf{V}}_{\mathbf{H}^{(l)}}) \leq B,$$

### D.3 Per-sample Quantizer

When  $\mathbf{S} = \text{diag}(s_1, \dots, s_N)$ , we can rewrite optimization problem (12) as

$$\min_{s_1, \dots, s_N} \sum_{i=1}^N s_i^{-2}, \text{ s.t. } s_i R(\hat{\mathbf{V}}_{\mathbf{h}_i^{(l)}}) \leq B, \forall i \in [N]_+. \quad (14)$$

Since the objective is monotonic w.r.t.  $s_i$ , problem (14) can be minimized when all the inequality constraints takes equality, i.e.,  $s_i R(\hat{\mathbf{V}}_{\mathbf{h}_i^{(l)}}) = B$ . Therefore,  $s_i = B/R(\hat{\mathbf{V}}_{\mathbf{h}_i^{(l)}})$ . Plug this back to Eq. (13), we have

$$\text{Var} [Q_b(\hat{\mathbf{V}}_{\mathbf{H}^{(l)}})] \leq \frac{D^{(l)}}{4} \left\| (\mathbf{S}^{(l)})^{-1} \right\|_F^2 = \frac{D^{(l)}}{4} \sum_{i=1}^N \left( B/R(\hat{\mathbf{V}}_{\mathbf{h}_i^{(l)}}) \right)^{-2} = \frac{D^{(l)}}{4B^2} \sum_{i=1}^N R(\hat{\mathbf{V}}_{\mathbf{h}_i^{(l)}})^2.$$

#### D.4 Householder Quantizer

Let  $\lambda_1 = R(\hat{\mathbf{V}}_{\mathbf{h}_1^{(L)}})$ ,  $\lambda_2 = 2 \max_{i \neq 1} \left\| \hat{\mathbf{V}}_{\mathbf{h}_i^{(L)}} \right\|_\infty$ , and assume  $\lambda_2/\lambda_1 \approx 0$ . Without loss of generality, we can write

$$\hat{\mathbf{V}}_{\mathbf{H}^{(l)}} = \begin{bmatrix} \hat{\mathbf{V}}_{\mathbf{h}_1^{(l)}} \\ \hat{\mathbf{V}}_{\mathbf{H}_{>1}^{(l)}} \end{bmatrix} = \begin{bmatrix} \hat{\mathbf{V}}_{\mathbf{h}_1^{(l)}} \\ \mathbf{0} \end{bmatrix} + \begin{bmatrix} \mathbf{0} \\ \hat{\mathbf{V}}_{\mathbf{H}_{>1}^{(l)}} \end{bmatrix} = \lambda_1 \mathbf{e}_1 \mathbf{u}_1 + \frac{1}{2} \lambda_2 \mathbf{U}_2,$$

such that  $R(\mathbf{u}_1) \leq 1$ , and  $\max_{i \neq 1} \left\| \hat{\mathbf{V}}_{\mathbf{h}_i^{(l)}} \right\|_\infty \leq 1$ , and  $\mathbf{e}_1$  is a column coordinate vector. Furthermore, we construct  $\mathbf{S}^{(l)} = \mathbf{Q} \text{diag}(s_1, s_2, \dots, s_2)$ , where  $\mathbf{Q} = \mathbf{I} - 2\mathbf{n}\mathbf{n}^\top / \|\mathbf{n}\|_2^2$  is a Householder reflection with the normal vector  $\mathbf{n} = \mathbf{1}/\sqrt{N} - \mathbf{e}_1$ .

We have

$$\begin{aligned} \mathbf{S}^{(l)} \hat{\mathbf{V}}_{\mathbf{H}^{(l)}} &= \mathbf{Q} \text{diag}(s_1, s_2, \dots, s_2) \left( \lambda_1 \mathbf{e}_1 \mathbf{u}_1 + \frac{1}{2} \lambda_2 \mathbf{U}_2 \right) = \mathbf{Q} \left( \lambda_1 s_1 \mathbf{e}_1 \mathbf{u}_1 + \frac{1}{2} \lambda_2 s_2 \mathbf{U}_2 \right) \\ &= \lambda_1 s_1 N^{-1/2} \mathbf{1} \mathbf{u}_1 + \frac{1}{2} \lambda_2 s_2 \mathbf{Q} \mathbf{U}_2. \end{aligned}$$

Then, utilizing  $R(\mathbf{u}_1) \leq 1$ ,

$$R(\lambda_1 s_1 N^{-1/2} \mathbf{1} \mathbf{u}_1) = \lambda_1 s_1 N^{-1/2} R(\mathbf{1} \mathbf{u}_1) = \lambda_1 s_1 N^{-1/2} (\max_j \mathbf{u}_{1j} - \min_j \mathbf{u}_{1j}) \leq \lambda_1 s_1 N^{-1/2}.$$

On the other hand,

$$R\left(\frac{1}{2} \lambda_2 s_2 \mathbf{Q} \mathbf{U}_2\right) = \frac{1}{2} \lambda_2 s_2 R(\mathbf{Q} \mathbf{U}_2) \leq \lambda_2 s_2 \|\mathbf{Q} \mathbf{U}_2\|_\infty = \lambda_2 s_2 \max_j \|\mathbf{Q} \mathbf{U}_{2,:j}\|_\infty,$$

and

$$\|\mathbf{Q} \mathbf{U}_{2,:j}\|_\infty \leq \|\mathbf{Q} \mathbf{U}_{2,:j}\|_2 = \|\mathbf{U}_{2,:j}\|_2 \leq \sqrt{N} \|\mathbf{U}_{2,:j}\|_\infty \leq \sqrt{N}.$$

Putting it together, we have

$$R(\mathbf{S}^{(l)} \hat{\mathbf{V}}_{\mathbf{H}^{(l)}}) \leq R(\lambda_1 s_1 N^{-1/2} \mathbf{1} \mathbf{u}_1) + R\left(\frac{1}{2} \lambda_2 s_2 \mathbf{Q} \mathbf{U}_2\right) \leq \lambda_1 s_1 N^{-1/2} + \lambda_2 s_2 N^{1/2}.$$

Therefore, problem (12) can be rewritten as

$$\min_{s_1, s_2} s_1^{-2} + (N-1)s_2^{-2}, \quad \text{s.t. } \lambda_1 s_1 N^{-1/2} + \lambda_2 s_2 N^{1/2} = B.$$

We minimize an upper bound instead

$$\min_{s_1, s_2} s_1^{-2} + N s_2^{-2}, \quad \text{s.t. } \lambda_1 s_1 N^{-1/2} + \lambda_2 s_2 N^{1/2} = B.$$

Introducing the multiplier  $\tau$ , and define the Lagrangian

$$f(s_1, s_2, \tau) = s_1^{-2} + N s_2^{-2} + \tau \left( \lambda_1 s_1 N^{-1/2} + \lambda_2 s_2 N^{1/2} - B \right).$$

Letting  $\partial f / \partial s_1 = \partial f / \partial s_2 = 0$ , we have

$$\begin{aligned} -2s_1^{-3} + \tau \lambda_1 N^{-1/2} &= 0 \Rightarrow s_1 \propto \lambda_1^{-1/3} N^{1/6} \\ -2N s_2^{-3} + \tau \lambda_2 N^{1/2} &= 0 \Rightarrow s_2 \propto \lambda_2^{-1/3} N^{1/6}, \end{aligned}$$

utilizing the equality constraint  $\lambda_1 s_1 N^{-1/2} + \lambda_2 s_2 N^{1/2} = B$ , we have

$$s_1 = B \frac{\lambda_1^{-1/3} N^{1/6}}{\lambda_1^{2/3} N^{-1/3} + \lambda_2^{2/3} N^{2/3}}, \quad s_2 = B \frac{\lambda_2^{-1/3} N^{1/6}}{\lambda_1^{2/3} N^{-1/3} + \lambda_2^{2/3} N^{2/3}}.$$

Therefore, we have

$$\left\| (\mathbf{S}^{(l)})^{-1} \right\|_F^2 = s_1^{-2} + (N-1)s_2^{-2} < s_1^{-2} + N s_2^{-2} = \frac{1}{B^2} \left( \lambda_1^{2/3} N^{-1/3} + \lambda_2^{2/3} N^{2/3} \right)^3,$$

plugging it to Eq. (13), we have

$$\text{Var} \left[ Q_b(\hat{\mathbf{V}}_{\mathbf{H}^{(l)}}) \right] \leq \frac{D^{(l)}}{4B^2} \left( \lambda_1^{2/3} N^{-1/3} + \lambda_2^{2/3} N^{2/3} \right)^3 \approx \frac{D^{(l)}}{4B^2} \lambda_1^2 N^{-1} = O(\lambda_1^2/N).$$

## D.5 Details of Block Householder Quantizer

We construct the block Householder quantizer as follows.

1. Sort the magnitude  $M_i := \left\| \hat{\nabla}_{\mathbf{h}_i^{(l)}} \right\|_{\infty}$  of each row in descending order.
2. Loop over the number of groups  $G$ . Assume that  $\{M_i\}$  is already sorted, we consider the first  $G$  rows as “large” and all the other  $N - G$  rows as “small”. The  $i$ -th group contains the  $i$ -th largest row and a number of small rows. Furthermore, we heuristically set the size of the  $i$ -th group to  $(N - G) \frac{M_i}{\sum_{i=1}^G M_i}$ , i.e., proportional to the magnitude of the large row in this group. Finally, we approximate the variance  $\left\| (\mathbf{S}^{(l)})^{-1} \right\|_F^2 \approx \sum_{i=1}^G M_i^2 / \left[ (N - G) \frac{M_i}{\sum_{i=1}^G M_i} \right]$  and select the best  $G$  with minimal variance.
3. Use the grouping of rows described in Step 2 to construct the block Householder quantizer.

## E Experimental Setup

**Model:** Our ResNet56-v2 model for CIFAR10 directly follows the original paper [40]. For the ResNet18/50 model, we adopt a slightly modified version, ResNetv1.5 [45]. The difference between v1.5 and v1 is, in the bottleneck blocks which requires downsampling, v1 has stride = 2 in the first 1x1 convolution, whereas v1.5 has stride = 2 in the 3x3 convolution. According to the authors, this difference makes v1.5 slightly more accurate ( $\sim 0.5\%$ ) than v1, but comes with a small performance drawback ( $\sim 5\%$  images-per-second).

**Model hyperparameter:** For CIFAR10, we follow the hyperparameter settings from the original papers [29, 40], with weight decay of  $10^{-4}$ .

For ImageNet, we keep all hyperparameters unchanged from [45], which has label smoothing=0.1, and weight decay=1/32768.

**Optimizer hyperparameter:** For CIFAR10, we follow the original paper [29], with a batch size of 128, initial learning rate of 0.1, and momentum 0.9. We train for 200 epochs.

For ImageNet, we follow [45], which has a momentum of 0.875. Due to limited device memory, we set the batch size to 50 per GPU with 8 GPUs in total, the initial learning rate is 0.4. We train for 90 epochs, and the first 4 epochs has linear warmup of the learning rate.

For both datasets, we use a cosine learning rate schedule, following [45].

**Quantization:** We follow the settings in [20]. All the linear layers are quantized, where the forward propagation is

$$\mathbf{F}^{(l)} \left( \tilde{\mathbf{H}}^{(l-1)}; \tilde{\Theta}^{(l)} \right) = \tilde{\mathbf{H}}^{(l-1)} \tilde{\Theta}^{(l)}, \text{ where } \tilde{\mathbf{H}}^{(l-1)} = Q_f \left( \mathbf{H}^{(l-1)} \right), \quad \tilde{\Theta}^{(l)} = Q_{\theta} \left( \Theta^{(l)} \right),$$

both  $Q_f(\cdot)$  and  $Q_{\theta}(\cdot)$  are deterministic PTQs that quantizes to 8-bit. The back propagation is

$$\hat{\nabla}_{\Theta^{(l)}} = \tilde{\mathbf{H}}^{(l-1)\top} Q_{b_1}(\hat{\nabla}_{\tilde{\mathbf{H}}^{(l-1)}}), \quad \hat{\nabla}_{\mathbf{H}^{(l-1)}} = Q_{b_2}(\hat{\nabla}_{\tilde{\mathbf{H}}^{(l-1)}}) \tilde{\Theta}^{(l)\top},$$

with gradient bifurcation [20]. We set  $Q_{b_1}$  to a 8-bit stochastic PTQ, and  $Q_{b_2}$  to PTQ, PSQ, or BHQ with 4-8 bits. The original paper [20] set  $Q_{b_1}$  as an identity mapping (i.e., not quantized), and  $Q_{b_2}$  to be 8-bit stochastic PTQ.

We quantize the inputs and gradients of batch normalization layers, as described in our framework.

**Number of training / evaluation runs:** Due to the limited amount of computation resources, we train on each setting for only once.

**Runtime & Computing Infrastructure:** Following [20], we simulate the training with FP32. Our simulator runs approximately 3 times slower than FP32 counterparts. We utilize a machine with 8 RTX 2080Ti GPUs for training.

## F Additional Experimental Results

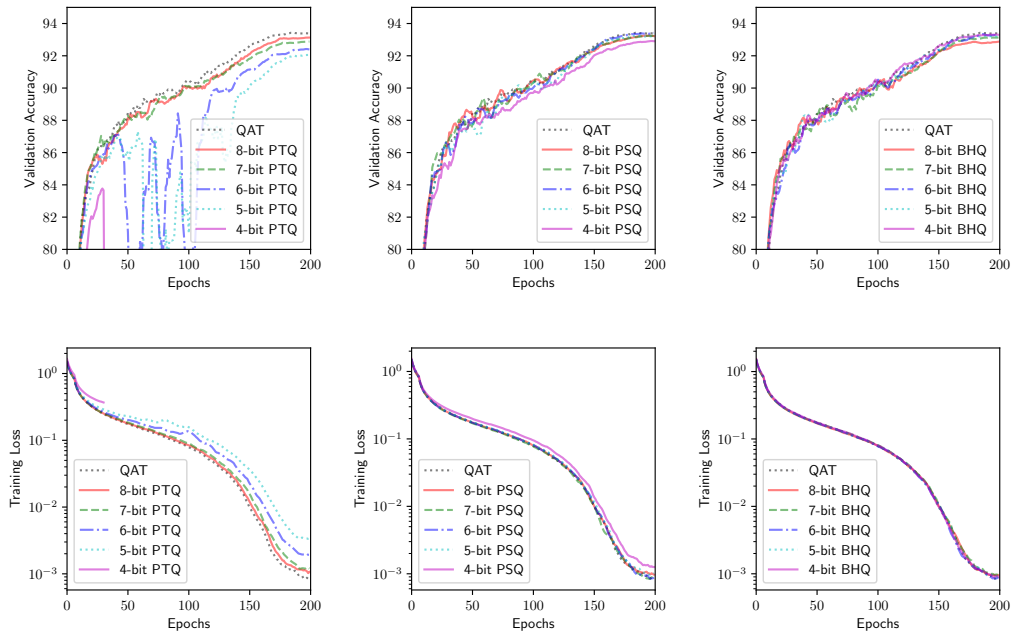

Figure 6: CIFAR10 convergence curves.

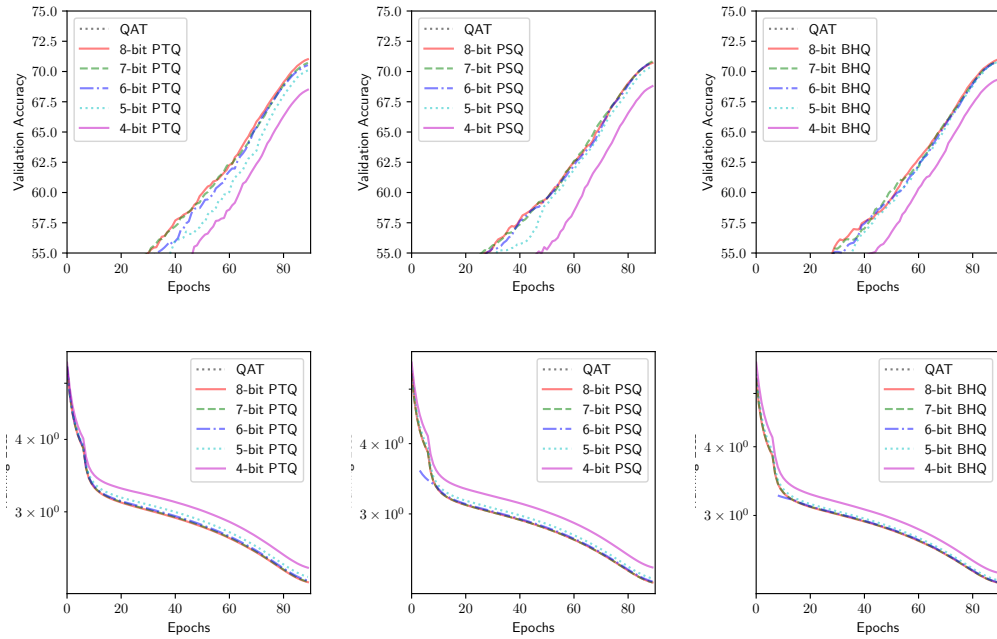

Figure 7: ResNet18 on ImageNet convergence curves.

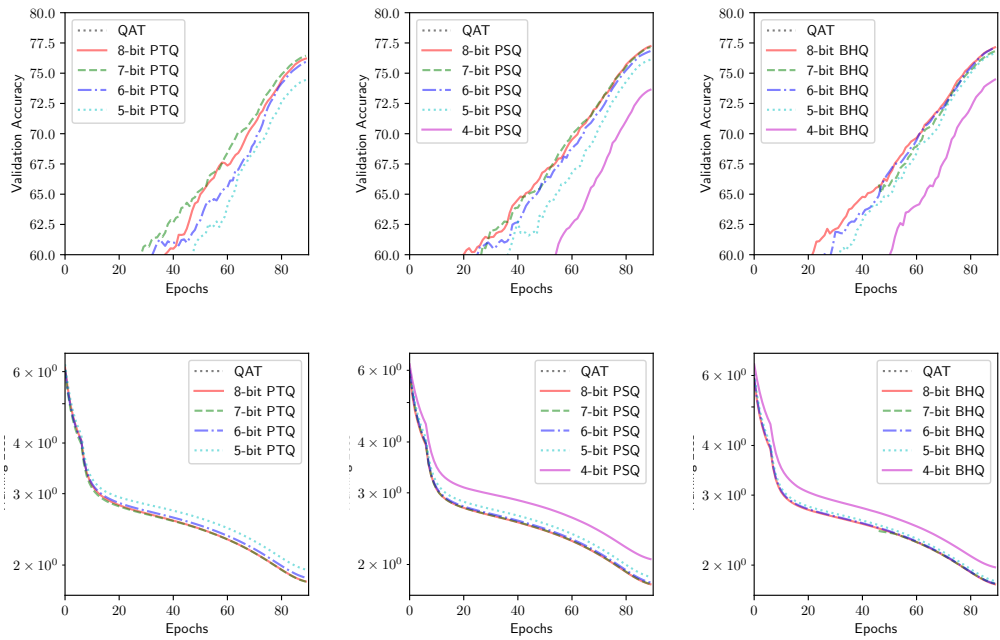

Figure 8: ResNet50 convergence curves.
